# Supplementary material for: Programmable Hybridization Assemble Nicked Displacement Amplification for Detecting Ricin Toxin
Source: Research Square preprint supplement (doi:10.21203/rs.3.rs-917396/v1), 2021-09-24
Supplement: Supplementary file 1 [file 5a525b4ad3f7c58b1b508781.docx]

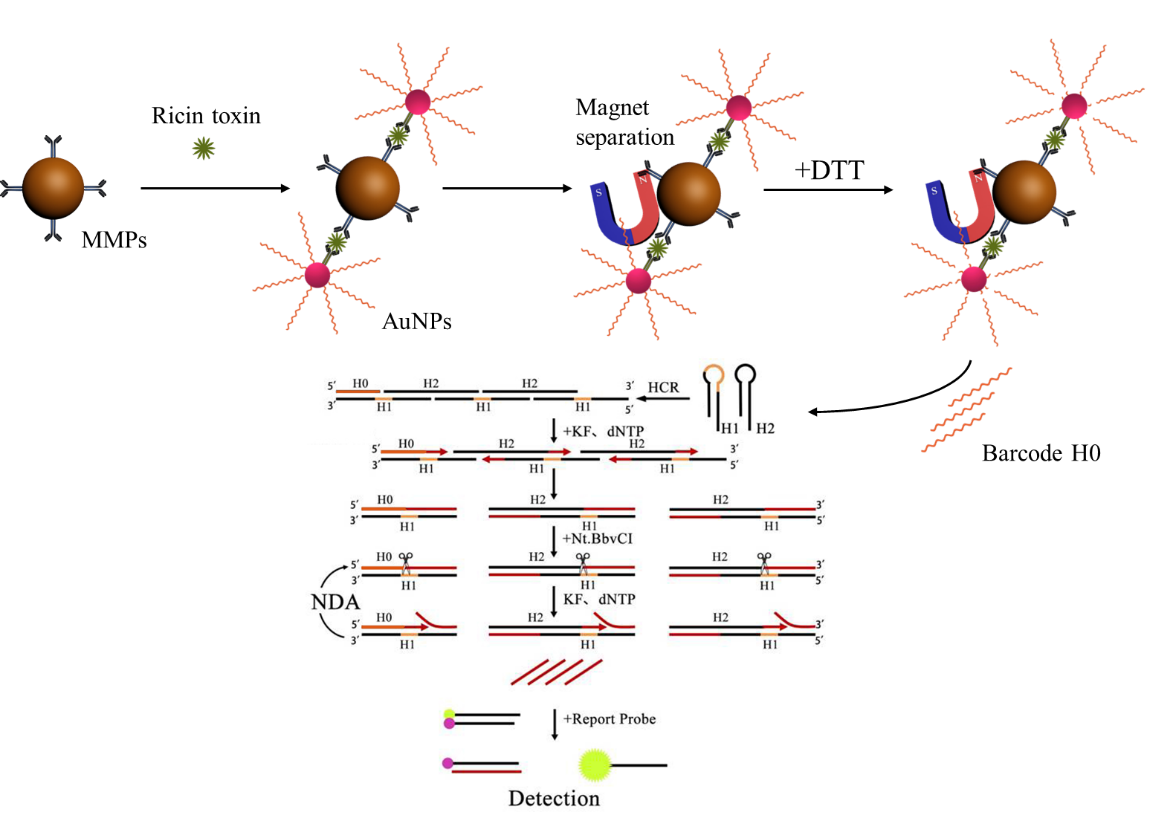


**Hybridization assemble nicked displacement amplification (HANDA) was combined with DNA barcodes (DNA barcodes-HANDA) to achieve ultra-sensitive detection of ricin.**

**The graphic entry for the Table of Contents (TOC)**
